# Supplementary material
Source: publisher figshare collection journal article supplement (https://gsajournals.figshare.com/ndownloader/files/14331767)
Supplement: Supplementary file 1 [file 14331767]

## Sheet: Sheet1
Supplementary File S1. Primer sets used for RT-PCR.
Gene name	Forward	Reverse	TM (Forward_Reverse)	Product size
lincRNA.12929.3	ACCCAGCCCTGTAATGATGC	TCAACTTCAGGATGCCTCTGG	60.1_59.7	114
lincRNA.20485.2	CTGCCTGGATGAAAGACCTC	GAGACGCCCATAATAGCACAC	57.96_58.86	140
lincRNA.2007.1	TGCTGTACTGTGCGTACAAC	CGTTAACTCCTCCTCCACAC	58.51_57.63	127
lincRNA.25383.1	CTTTCCTGAAGTTCCACCGTG	TGGCTGCTCTGGTACTTAGC	59.13_59.46	133
lincRNA.10527.1	GTCACGAGAATGAAGCCGTTG	TGGCGGACTTCTCTTTGTGG	59.9_60.2	104
lincRNA.1877.2	CCCATTCAACCCAACTTCAGC	CATCTCTCCGTCCATTTCCG	59.7_58.1	197
lincRNA.14167.1	GATCACTTCCCAGCCTGAAC	CTCTTCCTTGCCTCAACACC	58.3_58.5	120
lincRNA.4242.1	TGTCCCATCTGGAGAGCCTA	CAGGTTCCCTAACTGTCAGG	59.4_57.2	125
lincRNA.26767.1	ACAGGACCACTCTGGAGTTG	CTGCCGTTAGTGAACAAGCAC	58.9_60.1	176
lincRNA.5826.1	GGCTCTTGTGGACCTGATCTC	TGCCAAAGGGATCTTCTCTCAG	60.1_59.8	96
GAPDH	AGTTCCACGGCACAGTCAAG	CTTGATGTTGGCAGGATCTCG	60.53_59.06	95
